# Supplementary material for: Replacing Saturated Fat With Walnuts or Vegetable Oils Improves Central Blood Pressure and Serum Lipids in Adults at Risk for Cardiovascular Disease: A Randomized Controlled‐Feeding Trial
Source: PubMed Central journal article supplement — J Am Heart Assoc. 2019 May 1;8(9):e011512. doi: 10.1161/JAHA.118.011512 (PMC6512082; doi:10.1161/jaha.118.011512), 2019-05-01
Supplement: JAH3-8-e011512-s001.pdf [file JAH3-8-e011512-s001.pdf]

# **Supplemental Material**

**Table S1. Average study compliance for each participant, including participants that did not complete the entire study.**

| ID # | Total compliance (%) | ID # | Total compliance (%) |
|------|----------------------|------|----------------------|
| 1    | 87.9                 | 25   | 57.1                 |
| 2    | 98.5                 | 26   | 87.5                 |
| 3    | 91.4                 | 27   | 99.3                 |
| 4    | 91.4                 | 28   | 64.3                 |
| 5    | 99.3                 | 29   | 97.1                 |
| 6    | 87.9                 | 30   | 64.3                 |
| 7    | 95.7                 | 31   | 96.4                 |
| 8    | 99.3                 | 32   | 99.3                 |
| 9    | 96.9                 | 33   | 94.3                 |
| 10   | 93.6                 | 34   | 60.0                 |
| 11   | 85.7                 | 35   | 99.3                 |
| 12   | 91.4                 | 36   | 90.7                 |
| 13   | 85.7                 | 37   | 97.9                 |
| 14   | 71.4                 | 38   | 88.6                 |
| 15   | 98.6                 | 39   | 38.8                 |
| 16   | 98.6                 | 40   | 85.7                 |
| 17   | 84.3                 | 41   | 93.6                 |
| 18   | 71.4                 | 42   | 94.3                 |
| 19   | 87.1                 | 43   | 71.4                 |
| 20   | 72.9                 | 44   | 83.6                 |
| 21   | 92.1                 | 45   | 90.8                 |
| 22   | 21.4                 |      |                      |
| 23   | 97.9                 |      |                      |
| 24   | 55.0                 |      |                      |

**Table S2. Baseline characteristics from participants that did not complete (n=9) the study compared to those that completed the study (n=36)\*.**

| Characteristic           | Non-Completers | Completers |
|--------------------------|----------------|------------|
| cSBP (mmHg)              | 113±12         | 111±9      |
| cDBP (mmHg)              | 81±10          | 78±7       |
| bSBP (mmHg)              | 123±14         | 121±11     |
| bDBP (mmHg)              | 80±10          | 76±7       |
| AP (mmHg)                | 8±7            | 8±5        |
| Alx (%)                  | 27±17          | 21±14      |
| PTT (m/s)                | 69±11          | 68±8       |
| PWV (m/s)                | 7.2±10.9       | 6.9±0.8    |
| Age (y)                  | 42±10          | 43±10      |
| BMI (kg/m <sup>2</sup> ) | 31.5±3.9       | 30.0±4.9   |
| TC (mg/dL)               | 183.8±37.2     | 190.8±32.2 |
| LDL-C (mg/dL)            | 117.7±31.0     | 119.6±31.1 |
| HDL-C (mg/dL)            | 44.4±10.1      | 47.2±11.1  |
| TC:HDL-C ratio           | 4.4±1.5        | 4.3±1.1    |
| non-HDL-C (mg/dL)        | 139.7±40.5     | 143.6±32.0 |
| TG (mg/dL)               | 108.7±65.7     | 120.0±52.2 |
| Glucose (mg/dL)          | 90.7±9.3       | 90.9±7.1   |
| Insulin (μIU/mL)         | 7.0±4.2        | 6.7±3.6    |

\*Data presented as mean±SD. Baseline measurements were taken on the last 2 days of the run-in diet. There were no statistically significant differences between individuals that completed compared to those that did not complete the study.

**Table S3. Mean change from baseline for vascular outcomes\*.**

|             | WD                    | WFMD                  | ORAD                 |
|-------------|-----------------------|-----------------------|----------------------|
| bSBP (mmHg) | -2.1±1.2              | -1.2±1.4              | -1.2±1.1             |
| bDBP (mmHg) | -1.4±1.0 <sup>a</sup> | 0.5±1.0 <sup>ab</sup> | 0.4±0.7 <sup>b</sup> |
| bMAP (mmHg) | -1.4±0.7              | -0.2±0.7              | -0.1±0.7             |
| cSBP (mmHg) | -1.6±1.1              | -0.5±1.1              | -0.7±0.9             |
| cDBP (mmHg) | -1.8±1.0              | -0.2±0.8              | 0.1±0.7              |
| cMAP (mmHg) | -1.7±0.8              | -0.3±1.0              | -0.1±0.7             |
| AP (mmHg)   | -0.1±0.6              | 0.6±0.5               | 0.1±0.4              |
| Alx (%)     | 0.4±1.0               | 1.6±0.8               | 0.5±0.8              |
| PTT (ms)    | -0.2±1.0              | 0.2±0.6               | -0.5±0.9             |
| PWV (m/s)   | -0.4±0.5              | 0.008±0.1             | -0.2±0.2             |

\*Data presented as mean±SEM. Statistically significant between-diet differences are denoted with differing letters.

**Table S4. Mean change from baseline for lipids, lipoproteins, CRP, glucose, insulin, and weight\*.**

|                   | WD        | WFMD      | ORAD      |
|-------------------|-----------|-----------|-----------|
| TC (mg/dL)        | -15.8±3.2 | -14.6±2.9 | -11.2±2.7 |
| LDL-C (mg/dL)     | -13.4±3.0 | -11.1±2.3 | -9.2±2.3  |
| Non-HDL-C (mg/dL) | -14.0±3.0 | -12.5±2.5 | -11.0±2.2 |
| HDL-C (mg/dL)     | -1.8±0.8  | -2.1±0.9  | -1.1±0.7  |
| TC:HDL            | -0.2±0.1  | -0.1±0.1  | -0.1±0.05 |
| TG (mg/dL)        | -3.4±5.0  | -5.4±6.6  | -4.0±4.3  |
| CRP (mg/L)        | -0.05±0.2 | -1.0±0.5  | -0.6±0.4  |
| Glucose (mg/dL)   | 1.6±1.0   | -0.6±2.8  | 0.4±1.2   |
| Insulin (μIU/mL)  | -0.3±0.4  | -0.2±0.5  | 0.2±0.6   |
| Weight (kg)       | -1.4±0.4  | -0.72±0.3 | -1.4±0.5  |

\*Data presented as mean±SEM. There were no statistically significant between-diet differences.
